# Supplementary material
Source: Springer Nature journal article supplement (https://www.springermedizin.de/resource/supplementary/12891_2009_655_MOESM2_ESM.pdf/9506486)
Supplement: MOESM2 [file 9506486]

**Additional File 2:** Prevalence (29 studies) and incidence (5 studies) data grouped by pain definition and reported by age.

| Age (yrs)     | Period Prevalence (%)† |                    |                                    |         |        |                          | Period Incidence (%)† |         |        |         |
|---------------|------------------------|--------------------|------------------------------------|---------|--------|--------------------------|-----------------------|---------|--------|---------|
|               | Point                  | 7 day              | 1 month                            | 3 month | 1 year | Lifetime                 | 1 month               | 6 month | 1 year | 25 year |
| Any back pain |                        |                    |                                    |         |        |                          |                       |         |        |         |
| 7-17          |                        | 10.0 [60]          |                                    |         |        |                          |                       |         |        |         |
| 8-10          |                        |                    | 18.7 [57];<br>18.5M, 18.5F<br>[11] |         |        |                          |                       |         |        |         |
| 8-12          |                        | 23.0 [40]          |                                    |         |        |                          |                       |         |        |         |
| 10-14         |                        |                    |                                    |         |        | 17.1M,<br>18.9F [54]     |                       |         |        |         |
| 10-16         |                        | 3.4* [59]          |                                    |         |        | 12.0* [59]               |                       |         |        |         |
| 11-17         | 4.0 [53]               |                    |                                    |         |        | 15.6 [61]                |                       |         |        |         |
| 12            |                        | 21.2 [49]          | 34.8 [49]                          |         |        |                          |                       |         |        |         |
| 12-18         |                        |                    |                                    |         |        | 19.5 [42],<br>31.2* [42] |                       |         |        |         |
| 13            |                        | 2.8M, 6.7F<br>[12] | 22.0M, 23.0F<br>[67]               |         |        |                          |                       |         |        |         |
| 14            |                        | 5.6M,              |                                    |         |        |                          |                       |         | 23.5M, |         |

|                                   |                                 |                                                    |                      |
|-----------------------------------|---------------------------------|----------------------------------------------------|----------------------|
|                                   | 11.7F [12]                      |                                                    | 33.3F [12]           |
| 14-16                             |                                 | 18.0 [57];<br>21.9M, 15.8F<br>[11]                 |                      |
| 15                                | 5.6M,<br>11.7F [12]             |                                                    | 11.8M,<br>33.3F [12] |
| > 15                              | 0.9-3.6M,<br>2.9-9.4F ‡<br>[56] |                                                    |                      |
| 16                                | 9.7M,<br>15.0F [12]             |                                                    | 35.3M,<br>26.7F [12] |
| 17                                | 15.3M,<br>16.7F [12]            |                                                    | 29.4M,<br>6.7F [12]  |
| 20-72                             | 0.5, 0.7*<br>[52]               | 19.3-27.5 [68]                                     |                      |
| 35-70                             |                                 | 17.0 [13];<br>15.0 [46];<br>18.0M, 22.0F<br># [47] |                      |
| Pain associated with backpack use |                                 |                                                    |                      |
| 8-18                              | 6.0, 18.3^                      |                                                    |                      |

|    |                         |  |
|----|-------------------------|--|
|    | [48]                    |  |
| 9  | 14.0M, 9.0F             |  |
|    | # [65]                  |  |
| 10 | 38.0M,                  |  |
|    | 72.0F # [65]            |  |
| 11 | 14.0M,                  |  |
|    | 30.0F # [65]            |  |
| 12 | 26.0M,                  |  |
|    | 37.0F # [65]            |  |
| 13 | 11.7M, 22.9M,           |  |
|    | 38.0F # [65] 51.4F [58] |  |
| 15 | 31.4 [44];              |  |
|    | 24.0M,                  |  |
|    | 41.0F # [65]            |  |
| 17 | 31.4M,                  |  |
|    | 40.0F [58]              |  |

Pain interfering with school or leisure

|    |            |
|----|------------|
| 10 | 9.3M, 3.5F |
|    | [45]       |
| 14 | 9.7M, 9.5F |
|    | [45]       |

|                                                        |           |            |                    |
|--------------------------------------------------------|-----------|------------|--------------------|
| 16                                                     |           | 8.7M, 4.2F |                    |
|                                                        |           | [45]       |                    |
| Pain duration ≥ 1 day                                  |           |            |                    |
| 12                                                     | 18.0 [50] |            |                    |
| Daily pain for duration ≥ 1 week                       |           |            |                    |
| >18                                                    |           | 21.5 [51]  | 9.8                |
|                                                        |           |            | [62]               |
| Pain duration ≥ 15 days                                |           |            |                    |
| 20-80                                                  |           |            | 0.0-               |
|                                                        |           |            | 0.6M,              |
|                                                        |           |            | 0.3-               |
|                                                        |           |            | 1.0F               |
|                                                        |           |            | [43]               |
| Pain duration ≥ 1 month                                |           |            |                    |
| 9-11                                                   |           | 4.8M, 7.0F |                    |
|                                                        |           | # [66]     |                    |
| Pain frequency ≥ 1/week                                |           |            |                    |
| 10                                                     |           |            | 3.8 # [41]         |
| 13                                                     |           |            | 10.3 [69] 7.1 [69] |
| Pain associated with low back pain occurring ≥ 1/month |           |            |                    |
| 14-15                                                  | 20.4M,    |            |                    |

38.3F [64]

|                 |                |
|-----------------|----------------|
| Frequent pain   |                |
| 40-69           | 1.4-6.8 # [55] |
| Pain after work |                |
| 16-65           | 34.8 [39]      |

\* thoracolumbar spinal pain

^ cervicothoracic spinal pain

† M = males, F = females, C = genders combined

‡ age standardised prevalence values

# data extracted from a Figure
